# Supplementary material for: Native defects and impurity band behavior in half-Heusler thermoelectric NbFeSb
Source: Royal Society of Chemistry journal article supplement (doi:10.1039/c8cp04287j), 2018-01-01
Supplement: c8cp04287j1.pdf [file c8cp04287j1.pdf]

## Supplemental Material: Native defects and impurity band behavior in half-Heusler thermoelectric NbFeSb

Yefan Tian,<sup>1</sup> Hangtian Zhu,<sup>2</sup> Wuyang Ren,<sup>2,3</sup> Nader Ghassemi,<sup>1</sup> Emily  
Conant,<sup>1</sup> Zhiming Wang,<sup>3</sup> Zhifeng Ren,<sup>2,4</sup> and Joseph H. Ross, Jr.<sup>1,5,\*</sup>

<sup>1</sup>*Department of Physics and Astronomy,*

*Texas A&M University, College Station, TX 77843, USA*

<sup>2</sup>*Department of Physics, University of Houston, Houston, TX 77204, USA*

<sup>3</sup>*Institute of Fundamental and Frontier Sciences,*

*University of Electronic Science and Technology of China, Chengdu 610054, China*

<sup>4</sup>*Texas Center for Superconductivity at the University of Houston,*

*University of Houston, Houston, TX 77204, USA*

<sup>5</sup>*Department of Materials Science and Engineering,*

*Texas A&M University, College Station, TX 77843, USA*

(Dated: June 14, 2018)

---

\* jhross@tamu.edu

## I. STRETCHED-EXPONENTIAL SPIN-LATTICE RELAXATION ANALYSIS

This work includes an analysis of the stretched-exponential NMR  $T_1$  behavior due to paramagnetic impurities combined with a single-exponential relaxation process. A full description of this analysis procedure is as follows:

Tse and Hartmann [1] originally demonstrated that dilute paramagnetic impurities could produce a relaxation function of the form  $S(t) = S_0 \exp[-(t/\tau_1)^{1/2}]$ , a result which is valid in the long-time limit. This behavior is due to an inhomogeneous distribution of fluctuating fields due to random positioning of paramagnetic defects. A given nucleus thus undergoes statistical behavior corresponding locally to ordinary exponential relaxation. This superposition of nuclear responses can be written,

$$S(t) = S_0 \exp[-(t/\tau_1)^{1/2}] = S_0 \sum_i c_i \exp[-t/(T_{1s})_i], \quad (1)$$

where the  $c_i$  are a set of weighting factors corresponding to the distribution of exponential relaxation times  $(T_{1s})_i$ , and the summation in Eqn. (1). represents a discrete approximation to the continuous inhomogeneous distribution.

We examine the situation where this is combined with a second uniform relaxation process due to metallic electrons, which alone would produce a relaxation function  $S(t) = S_0 \exp[-(t/T_{1,\text{exp}})]$ . Since for locally exponential processes the rates will add, we obtain the combined relaxation function,

$$S(t) = S_0 \exp[-(t/T_{1,\text{exp}})] \sum_i c_i \exp[-t/(T_{1s})_i]. \quad (2)$$

To obtain the parameters for the summation in Eqn. (1), we chose seven  $(T_{1s})_i$  values which were initially logarithmically distributed over 4 orders of magnitude, and fitted to the stretched exponential  $\exp[-(t/\tau_1)^{1/2}]$  by performed a least squares minimization of the parameters  $(T_{1s})_i$  and  $c_i$ , the result being a sum of exponentials with single effective parameter  $\tau_1$  which could be varied by scaling all  $(T_{1s})_i$  values by an identical factor.

Results of the fitting process are shown in Fig. 1, for the three temperatures near the observed relaxation peak. As explained in the main text, we obtained  $\tau_1$  from the paramagnetic impurity density and moment determined in this work, using Eqn. (3) in the main text, which contains the function  $(\omega\tau_c/(1 + \omega^2\tau_c^2))^{1/2} \equiv F(\omega, \tau_c)$ , containing  $\tau_c$  which is the spin-lattice relaxation time for the local moment. Since the temperature dependence of  $\tau_c$  is not

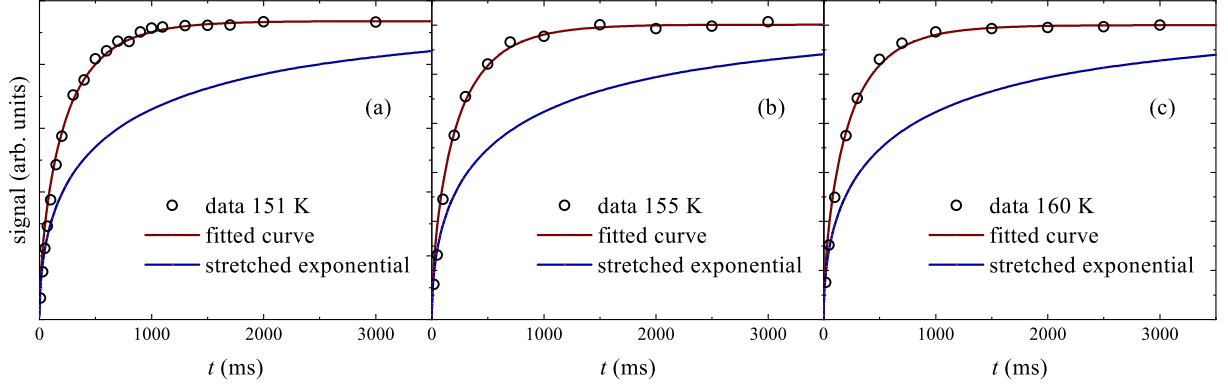

FIG. 1. Saturation-recovery plots for three temperatures, (a) 151 K, (b) 155 K, and (c) 160 K, with fitted curves described in text. Stretched exponentials alone (fitted curves with  $\exp[-(t/T_{1,\text{exp}})]$  removed) are also shown for comparison.

known,  $F(\omega, \tau_c)$  cannot be in general be evaluated except at its maximum point ( $\omega = \tau_c^{-1}$ ) where  $F(\omega, \tau_c) = 2^{-1/2}$ . Therefore, the fitting process was carried out for temperatures only at the apparent peak of the exponential-fitted NMR relaxation rate vs temperature. With  $\tau_1$  fixed the fitting to  $(S_0 - S(t))$  involved two parameters,  $S_0$  and  $T_{1,\text{exp}}$ , for each temperature. Since the stretched-exponential recovery function is not valid at very short times during the initial recovery process, the fitting was limited for these curves to  $t \geq 200$  ms, for which  $S(t)/S_0 < 0.5$ .

---

[1] D. Tse and S. Hartmann, Phys. Rev. Lett. **21**, 511 (1968).
